# Supplementary material for: Helios but not CD226, TIGIT and Foxp3 is a Potential Marker for CD4+ Treg Cells in Patients with Rheumatoid Arthritis
Source: PubMed Central journal article supplement (PMC6943339; doi:10.33594/000000080), 2019
Supplement: NIHMS1065446-supplement-Supplemental_Figures_1_2.pdf [file NIHMS1065446-supplement-Supplemental_Figures_1_2.pdf]

## Supplementary Material

# Helios But Not CD226, TIGIT and Foxp3 is a Potential Marker for CD4<sup>+</sup> Treg Cells in Patients with Rheumatoid Arthritis

Mengru Yang<sup>a,b</sup> Yan Liu<sup>b</sup> Biyao Mo<sup>c</sup> Youqiu Xue<sup>b</sup> Congxiu Ye<sup>b</sup> Yutong Jiang<sup>a</sup> Xuan Bi<sup>a</sup>  
Meng Liu<sup>d</sup> Yunting Wu<sup>b</sup> Julie Wang<sup>e</sup> Nancy Olsen<sup>e</sup> Yunfeng Pan<sup>a</sup> Song Guo Zheng<sup>f</sup>

<sup>a</sup>Division of Rheumatology, Department of Internal Medicine, the Third Affiliated Hospital, Sun Yat-Sen University, Guangzhou, China, <sup>b</sup>Center for Clinical Immunology, the Third Affiliated Hospital, Sun Yat-Sen University, Guangzhou, China, <sup>c</sup>Division of Rheumatology, Department of Internal Medicine, Hainan General Hospital, Haikou, China, <sup>d</sup>Division of Rheumatology, Department of Internal Medicine, Guangdong Second Provincial Central Hospital, Guangzhou, China, <sup>e</sup>Division of Rheumatology, Department of Medicine, Penn State University Hershey College of Medicine, Hershey, PA, USA, <sup>f</sup>Department of Internal Medicine, Ohio State University College of Medicine and Wexner Medical Center, Columbus, OH, USA

### Supplemental figure 1

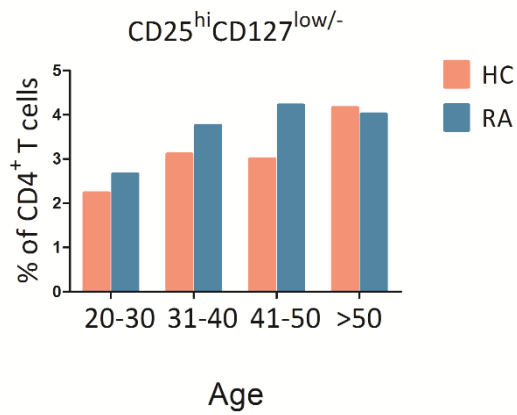

**Supplemental figure 1.** Frequencies of CD4<sup>+</sup>CD25<sup>hi</sup>CD127<sup>low/-</sup> Treg in peripheral blood of HC and RA patients of different ages.

### Supplemental figure 2

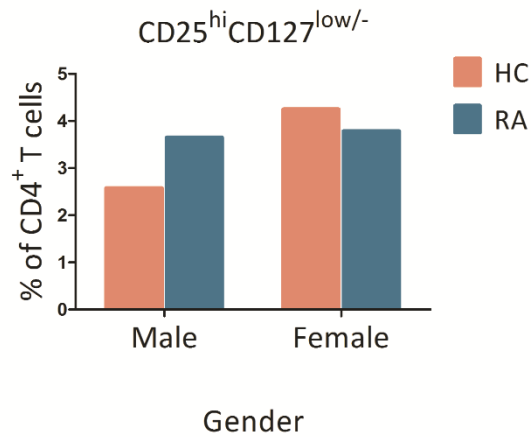

**Supplemental figure 2.** Frequencies of CD4<sup>+</sup>CD25<sup>hi</sup>CD127<sup>low/-</sup> Treg in peripheral blood of HC and RA patients of different gender.
